# Supplementary material for: Extensive co-binding and rapid redistribution of NANOG and GATA6 during emergence of divergent lineages
Source: PubMed Central journal article supplement (PMC9308780; doi:10.1038/s41467-022-31938-5), 2022-07-23
Supplement: 41467_2022_31938_MOESM3_ESM.pdf [file 41467_2022_31938_MOESM3_ESM.pdf]

## Description of Additional Supplementary Files

### Supplementary Data1

- a. Mapping information for each replicate used in the RNA-seq analysis.
- b. List of genes identified as Epi or PrE specific in single-cell RNAseq datasets, and genes identifies as up- and down-regulated during in vitro PrE differentiation.
- c. Mapping and peak information for each replicate on which ATAC-seq was performed.
- d. Mapping and peak information for replicates from CUT&RUN analysis.
- e. Mapping and peak information for replicates from CUT&TAG analysis.
- f. Mapping and peak information for replicates from ChIP-seq analysis.
- g. Mapping information for HiC and Capture-C analysis.
- h. List of biotinylated oligos used in Capture-C
